# Supplementary material for: Molecular Subtype-Specific Immunocompetent Models of High-Grade Urothelial Carcinoma Reveal Differential Neoantigen Expression and Response to Immunotherapy
Source: Oxford University Press journal article supplement (doi:10.1158/0008-5472.can-18-0173), 2018-05-21
Supplement: 00085472can180173-sup-195710_2_supp_4660744_p6f7kk.xlsx [file 00085472can180173-sup-195710_2_supp_4660744_p6f7kk.xlsx]

## Sheet: Supplemental Table 1
Supplemental Table 1. Flow cytometry antibody information
Manufacterer	panel	Antibody	Clone	Fluorochrome	concentration	catalog #	optimal dilution based on current lot #
BD Biosciences	T cell	CD45	30-F11	Brilliant Violet 510	0.2 mg/ml	563891	1:400
BD Biosciences	T cell	Fixable Viability Stain	n/a	FVS 700	n/a	564997	1:1000
BD Biosciences	T cell	CD4	RMA-4	FITC	0.5 mg/ml	553046	1:100
BD Biosciences	T cell	CD3e	145-2C11	APC	0.2 mg/ml	553066	1:100
BD Biosciences	T cell	CD8a	53-6.7	APC H7	0.2 mg/ml	560182	1:50
BD Biosciences	T cell	CD44	IM7	PerCPCy5.5	0.2 mg/ml	560570	1:200
BD Biosciences	T cell	CD62L	MEL-14	Brilliant Violet 421	0.2 mg/ml	562910	1:200
BD Biosciences	T cell	FoxP3	R16-715	PE	0.2 mg/ml	563101	1:100
BD Biosciences	B cell	CD45	30-F11	Brilliant Violet 510	0.2 mg/ml	563891	1:400
BD Biosciences	B cell	Fixable Viability Stain	n/a	FVS 700	n/a	564997	1:1000
BD Biosciences	B cell	CD45R/B220	RA3-6B2	APC H7	0.2 mg/ml	565371	1:50
BD Biosciences	B cell	CD73	TY/23	Alexa Fluor 488	0.2 mg/ml	561545	1:100
BD Biosciences	B cell	CD80	16-10A1	APC	0.2 mg/ml	560016	1:100
BD Biosciences	B cell	IgD	11-26c.2a	PerCPCy5.5	0.2 mg/ml	564273	1:100
BD Biosciences	B cell	CD273/PD-L2	TY25	Brilliant Violet 421	0.2 mg/ml	564245	1:50
BD Biosciences	B cell	CD27	Lg.3A10	PE	0.2 mg/ml	558754	1:100
BD Biosciences	B cell	IgM	R6-60.2	Brilliant Violet 786	0.2 mg/ml	564028	1:100

## Sheet: Supplemental Table 2
Supplemental Table 2: List of genes (top 10% most differentially expressed genes) used to cluster mouse cell lines from Figure 3D
40969
1110021L09Rik
1190002N15Rik
1190007F08Rik
1600016N20Rik
1700001L05Rik
1700001O22Rik
1700029G01Rik
1700029I01Rik
2210016F16Rik
2310002L13Rik
2310033E01Rik
2310043J07Rik
2310046K01Rik
2410075B13Rik
2610018G03Rik
2610035D17Rik
2810055F11Rik
2810408A11Rik
2810442I21Rik
4632428N05Rik
4833423E24Rik
4930412O13Rik
5730469M10Rik
5730559C18Rik
6030429G01Rik
6330406I15Rik
6530402F18Rik
6530418L21Rik
8430408G22Rik
9030425E11Rik
9130017N09Rik
9330182L06Rik
9430020K01Rik
9530009M10Rik
9830001H06Rik
9930014A18Rik
9930023K05Rik
9930111J21Rik1
A230050P20Rik
A430107O13Rik
A430110N23Rik
A4galt
A530032D15Rik
AA467197
AA986860
Abca1
Abca12
Abcb1a
Abcb1b
Abcg2
Ablim3
Acap1
Ace
Acer2
Acp5
Acsbg1
Acss1
Acta1
Acta2
Actg2
Acvrl1
Adam12
Adam19
Adam8
Adamts5
Adamts9
Adap1
Adcy3
Adh7
Adm2
Adora2b
Adrb1
Afap1l1
Aff3
Agap2
AI429214
AI467606
AI661453
AI836003
Aif1
Aim1l
Aim2
AK129341
Ak4
Akap12
Aknad1
Akr1c12
Akr1c13
Akr1c18
Alcam
Aldh1a1
Aldh1a3
Aldh1l1
Aldh1l2
Aldh3a1
Aldh3b2
Aldoc
Alox12
Alox12b
Alox5ap
Aloxe3
Alpl
Amdhd1
Angptl6
Ank1
Ank2
Ankk1
Ankrd22
Ankrd33b
Ankrd35
Anpep
Apba1
Apbb1ip
Apc2
Aph1c
Aplp1
Apol6
Apol9a
Apol9b
Apold1
Aqp1
Aqp3
Aqp4
Areg
Arg1
Arhgap30
Arhgap32
Arhgap40
Arhgap8
Arhgap9
Arhgdib
Arhgef16
Arhgef26
Arhgef4
Arl14
Arl6ip1
Armcx1
Armcx2
Armcx3
Aspa
Atp10b
Atp10d
Atp1a3
Atp1b1
Atp2a3
Atp2b4
Atp2c2
Atp6v0e2
Atp8b1
Atp9a
AU018091
Auts2
Axin2
B4galnt3
Bace2
Bai1
Barx2
Basp1
BC048355
BC064078
BC100530
Bcas1
Bcat1
Bcl2l14
Bcl2l15
Bdh1
Bend4
Bgn
Bhlhb9
Bhlhe41
Bicc1
Bmf
Bmp2
Bmp3
Bmp4
Bmp6
Bmp7
Boc
Bpifc
Bst1
Btc
C130026I21Rik
C1qtnf1
C1qtnf6
C1ra
C1s
C3
C4b
C630004H02Rik
C77370
Cachd1
Cacna1g
Cacna2d1
Calml3
Camk1d
Camk2b
Camk4
Camsap3
Capn5
Car12
Card10
Card14
Casp12
Casz1
Cbr2
Ccbl2
Ccdc104
Ccdc159
Ccdc64b
Ccdc68
Ccl2
Ccl3
Ccl5
Ccl7
Ccl8
Ccl9
Cd109
Cd200
Cd300a
Cd300lf
Cd33
Cd34
Cd36
Cd53
Cd55
Cd74
Cd84
Cd93
Cd97
Cdc42ep5
Cdh1
Cdh2
Cdh3
Cdhr1
Cdkn2a
Cdkn2b
Cdo1
Cds1
Cdyl2
Ceacam1
Ceacam19
Cebpa
Celf4
Celsr1
Cercam
Ces2e
Ces2f
Chdh
Chit1
Chst1
Chst2
Chst3
Chst7
Ckmt1
Clca1
Clca2
Clca4
Clca5
Cldn1
Cldn23
Cldn7
Cldn8
Clec4e
Clic3
Clip4
Clu
Cmah
Cmbl
Cnksr1
Cntln
Cobl
Col17a1
Col1a1
Col1a2
Col3a1
Col4a6
Col5a2
Col5a3
Col6a1
Col6a2
Col7a1
Colec12
Coro2b
Cpne5
Cpne8
Cpt1c
Cpxm2
Crb3
Creb5
Crlf1
Crnn
Csf3
Csf3r
Cspg5
Ctgf
Cthrc1
Ctla2a
Ctla2b
Ctnnd2
Ctsc
Ctss
Cul9
Cwh43
Cxadr
Cxcl10
Cxcl12
Cxcl2
Cxcl3
Cxcl5
Cxcl9
Cxx1a
Cyp1b1
Cyp27a1
Cyp2d22
Cyp2f2
Cyp2s1
Cyp39a1
Cyp7b1
Cysltr1
Cytip
D0H4S114
D14Ertd668e
D17H6S56E-3
D18Ertd653e
Daam2
Dach1
Dapk1
Dapk2
Dclk1
Dcn
Ddah2
Ddr2
Defb1
Degs2
Dennd5b
Depdc1b
Des
Dhrs9
Dkk3
Dlg4
Dmd
Dmkn
Dmrta2
Dock11
Dock3
Dock6
Dpyd
Dpysl3
Dsc2
Dsg2
Dsg3
Dsp
Dtna
Duox1
Duox2
Duoxa1
Duoxa2
Dusp1
Dyrk1b
Dzip1
Ece1
Ecm1
Ecscr
Eda
Eda2r
Edn1
Ednra
Eepd1
Efemp1
Efhc1
Efna3
Egfl7
Egr1
Egr2
Ehf
Elf3
Elf5
Ell3
Elmo3
Eln
Elovl4
Emilin1
Emilin2
Endou
Engase
Enho
Eno2
Eno3
Enpp1
Enpp2
Enpp5
Epas1
Epb4.1l3
Epb4.9
Epcam
Epha1
Ephb3
Ephx2
Ephx3
Epn3
Esam
Esrp2
Esyt3
Evi2a
Evpl
Exph5
Extl1
Eya2
F2rl1
F3
Fa2h
Fabp4
Fads1
Fads2
Fads3
Fahd2a
Fam105a
Fam109b
Fam110b
Fam131a
Fam131c
Fam135a
Fam167a
Fam171b
Fam189a2
Fam190a
Fam195a
Fam198b
Fam20c
Fam38b
Fam40b
Fam49a
Fam57b
Fam59a
Fam5c
Fam81a
Fam83a
Fam83e
Fam83f
Fam84a
Fbln1
Fbln2
Fbln5
Fbp2
Fbxl16
Fbxo41
Fcamr
Fcgr4
Fcho1
Fer1l4
Fermt1
Fes
Fgd4
Fgf1
Fgf7
Fgfbp1
Fgfr1
Fgfr2
Fhl1
Fibin
Fjx1
Fkbp10
Flrt1
Flt1
Flt3
Flt4
Fmo5
Fos
Fosl1
Foxc1
Foxn1
Foxo6
Foxred2
Fras1
Frmpd1
Fscn1
Fut1
Fut9
Fxyd3
Fyn
Gabrp
Gal3st4
Galk1
Galnt3
Galnt6
Galntl4
Gap43
Gata2
Gbp3
Gbp7
Gbp9
Gcnt3
Gdf15
Gdpd2
Gfra2
Ggh
Ggt5
Gjb2
Gjb5
Gldc
Gli1
Glrp1
Gm10451
Gm106
Gm11545
Gm129
Gm13251
Gm14403
Gm14446
Gm4532
Gm4951
Gm8615
Gna15
Gnao1
Gpa33
Gpc1
Gpc4
Gpm6b
Gpnmb
Gpr111
Gpr115
Gpr116
Gpr146
Gpr153
Gpr160
Gpr171
Gpr35
Gpr39
Gpr56
Gpr68
Gpr87
Gpr97
Gprc5c
Gpx2
Gpx3
Grb10
Grem1
Grhl2
Gria3
Gsdma
Gsdmc2
Gsdmc3
Gsta4
Gstk1
Gstm2
Gstt2
Gt(ROSA)26Sor
Gvin1
H19
H1fx
H2-Aa
H2-Ab1
H2afy2
H2-DMa
H2-Eb1
H2-Q7
Haghl
Has2
Has3
Hcls1
Hddc3
Hdgfrp3
Hgfac
Hivep3
Hlf
Hmha1
Hoga1
Homer2
Hopx
Hoxa2
Hoxa7
Hoxb4
Hp
Hpgd
Hpgds
Hpse
Hrh1
Hs3st3b1
Hsd11b1
Hspa12a
Htatip2
Htra1
Hunk
Icam1
Ifi202b
Ifi203
Ifi204
Ifi205
Ifi44
Ifit1
Ifit3
Ifitm1
Igf1
Igf2
Igf2bp3
Igf2r
Igfbp2
Igfbp4
Igfbp5
Igfbp6
Igsf5
Igsf9
Iigp1
Ikzf2
Il17re
Il18
Il18rap
Il1a
Il1f9
Il1rap
Il1rl1
Il1rn
Il22ra1
Il23a
Il24
Il28ra
Il2rg
Il33
Ildr1
Inadl
Inhbb
Inpp5d
Iqgap2
Irf6
Irf7
Irf8
Irx2
Irx3
Isyna1
Itga1
Itga7
Itgb6
Itgb7
Itm2a
Itpripl2
Ivl
Jag2
Jup
Kcnab2
Kcnc3
Kcnh1
Kcnj15
Kcnk1
Kcnk7
Kcnq1ot1
Kctd12b
Kctd14
Kif5c
Kit
Klhdc7a
Klhl23
Klhl29
Klk7
Klra2
Kprp
Krba1
Krt1
Krt14
Krt15
Krt16
Krt17
Krt19
Krt20
Krt23
Krt4
Krt5
Krt6a
Krt6b
Krt7
Krt78
Krt79
Krtcap3
L1cam
Lad1
Lama3
Lamb3
Lamc2
Lass3
Lat2
Layn
Lbp
Lcn2
Ldhb
Ldhd
Ldlrad3
Lfng
Lgals4
Lgals7
Lgi2
Lilrb3
Lipg
Liph
Lipm
Lipo1
Lmo1
Lox
Loxl1
Loxl2
Loxl3
Lphn1
Lphn3
Lpl
Lrmp
Lrp4
Lrrc32
Lrrk2
Lsp1
Lsr
Ltbp2
Ltf
Ly6a
Ly6d
Lypd3
Lypd5
Lypd6b
Lyve1
Lyz2
Mab21l3
Macc1
Macrod2
Mafb
Mal
Mal2
Mall
Mamdc2
Map2k6
Map3k15
Map3k9
Marcksl1
Marveld3
Mboat2
Mcam
Mctp2
Mdm2
Me1
Mertk
Mest
Mfap3l
Mgat3
Mgat4a
Mgl2
Mgmt
Mgst2
Mical1
Mill1
Mir1941
Mmp10
Mmp13
Mmp15
Mmp2
Mmp23
Mmp9
Mmrn2
Mns1
Mogat2
Morn4
Moxd1
Mpdz
Mpeg1
Mpped2
Mpzl2
Mpzl3
Mrc1
Mrc2
Msn
Msrb3
Mst1r
Msx2
Mtap2
Mtap7
Mtus1
Muc1
Muc20
Muc4
Mx2
Mxra7
Mxra8
Mycbpap
Mycl1
Myh10
Myh14
Myl9
Mylk
Myo1g
Myo5b
Myo5c
Myo7a
Myzap
Naip5
Naprt1
Nat8l
Ncf1
Nckap1l
Ncrna00085
Ndrg2
Ndufa4l2
Nebl
Nes
Neurl3
Nfatc2
Nfe2l3
Ngfr
Niacr1
Nid1
Ninl
Nipal4
Nlrc5
Nlrp10
Nme4
Nmnat2
Nod2
Nol3
Nos2
Nov
Noxo1
Npepl1
Npr2
Npr3
Nptx1
Npy1r
Nqo1
Nr1h3
Ntn1
Ntng2
Nts
Nudt12
Nup210
Oas1a
Oas1b
Oas1c
Oas2
Oas3
Oasl1
Oasl2
Obsl1
Ociad2
Odc1
Ogdhl
Oit1
Olfm1
Olfm2
Olfml2a
Olfr1372-ps1
Olr1
Ovol1
P2rx7
Padi2
Padi3
Padi4
Pag1
Palld
Palmd
Pamr1
Papln
Pard6g
Pbp2
Pcdhga11
Pcdhga5
Pcdhga6
Pcdhga7
Pcdhgb6
Pcolce2
Pcsk6
Pde2a
Pde4b
Pde4d
Pde8a
Pdgfb
Pdgfra
Pdpn
Pdss1
Peg3
Peli2
Perp
Pfn2
Pgap1
Pgbd5
Pgcp
Pglyrp1
Pglyrp4
Phactr2
Phf19
Phlda3
Pi15
Pigr
Pik3ap1
Pik3ip1
Pik3r5
Pitpnm3
Pitx1
Pkp1
Pla2g4f
Pla2g7
Plagl1
Plau
Plce1
Plch2
Plcl1
Plcl2
Plekhg1
Plekhg6
Pllp
Pls1
Plxdc1
Pmaip1
Podxl
Porcn
Postn
Pou2af1
Pou3f1
Ppargc1b
Ppbp
Ppfibp2
Ppm1e
Ppm1h
Ppm1j
Ppp1r14c
Ppp1r36
Ppp2r2c
Pram1
Prkar1b
Prkch
Prl2c3
Prnd
Prom1
Prom2
Pros1
Prr15l
Prr9
Prrg1
Prrx1
Prss22
Prss23
Prss27
Prss8
Prune2
Psapl1
Psca
Psmb9
Ptgr1
Pthlh
Ptk7
Ptn
Ptp4a3
Ptplad2
Ptprb
Ptprf
Ptprn
Ptprn2
Ptprs
Ptpru
Pvrl4
Pxdn
Pycard
Pygl
Pyhin1
Rab15
Rab19
Rab25
Rab27b
Rab37
Rab38
Rab40b
Rab6b
Rac3
Ranbp17
Rarb
Rasgrp1
Rasgrp3
Rasl10a
Rassf10
Rassf4
Rassf9
Rbp1
Rbpms
Rcn3
Rdm1
Reep1
Renbp
Reps2
Rerg
Rgs16
Rgs20
Rgs4
Rhbdl3
Rhov
Ripk4
Rnf122
Rnf128
Rnf144b
Rnf43
Ror2
Rorc
Rpgrip1
Rps6ka6
Rragb
Rsad2
Rtn4r
Rtn4rl1
Rtp4
Runx3
Rwdd3
S100a14
S100a4
S100a9
Samd12
Samsn1
Sbsn
Scara3
Scarf2
Scel
Scin
Scn1b
Scn4b
Sdc1
Sdpr
Sdr42e1
Sec16b
Sema3a
Sema3b
Sema3d
Sema4a
Sema4f
Sema6b
Sema6d
Sepp1
Serinc2
Serpinb10-ps
Serpinb11
Serpinb1a
Serpinb2
Serpinb5
Serpinb8
Serpinb9b
Serpine2
Sfn
Sgpp2
Sh2d4a
Sh3gl2
Sh3rf2
Sh3yl1
Shank2
Six1
Skint3
Sla
Slamf7
Slc12a4
Slc14a1
Slc16a11
Slc16a14
Slc16a2
Slc16a6
Slc16a9
Slc17a9
Slc1a1
Slc22a17
Slc22a18
Slc22a21
Slc24a3
Slc26a6
Slc27a3
Slc29a1
Slc2a3
Slc2a6
Slc30a1
Slc35f2
Slc37a2
Slc38a1
Slc39a4
Slc40a1
Slc41a2
Slc43a3
Slc46a3
Slc4a8
Slc5a8
Slc5a9
Slc6a14
Slc7a11
Slc7a8
Slc9a2
Slc9a4
Slco2a1
Slco3a1
Slco4a1
Slco5a1
Slfn2
Slurp1
Smad6
Smoc1
Smoc2
Sncg
Soat2
Sod3
Sorbs3
Sorcs2
Sort1
Sowaha
Sox11
Sox2
Sox21
Sox4
Sp100
Sp110
Sp140
Sp6
Spa17
Sparc
Sparcl1
Spats2
Spink5
Spint1
Spns2
Spon2
Spp1
Sprr1a
Sprr1b
Sprr2d
Sprr2f
Sprr2h
Sprr2k
Sprr3
Sptlc3
Srgap1
Srpx
St14
St3gal5
St8sia1
Stard8
Stc2
Steap4
Stmn2
Stox2
Stra6
Strc
Sult4a1
Susd1
Susd2
Syngr1
Syt16
Syt6
Syt7
Syt8
Sytl1
Sytl5
Tacstd2
Tagap
Tanc2
Tbx18
Tcf7l1
Tchh
Tcn2
Tctn2
Tead2
Tfpi
Tfrc
Tgfb1i1
Tgfbr3
Tgm1
Tgm5
Tgtp2
Thbd
Thbs2
Thsd4
Thsd7a
Tigit
Timp3
Tinag
Tjp3
Tll1
Tmc4
Tmc7
Tmc8
Tmeff1
Tmem119
Tmem121
Tmem125
Tmem176b
Tmem184a
Tmem30b
Tmem37
Tmem40
Tmem44
Tmem45a
Tmem45b
Tmem53
Tmem56
Tmem98
Tmie
Tmprss11a
Tmprss11bnl
Tmprss11d
Tmprss11e
Tmprss11g
Tmprss2
Tmprss4
Tnc
Tnf
Tnfrsf11b
Tnfrsf19
Tnfsf13
Tnfsf13b
Tnik
Tnip3
Tnni2
Tnnt2
Tns4
Tpd52l1
Tppp
Traf1
Traf3
Trim29
Trim34a
Trim36
Trp53
Trp53i11
Trp63
Trp73
Trpv2
Tshz2
Tshz3
Tspan13
Tspan15
Tspan33
Tspan6
Tspan7
Tspan8
Ttc12
Ttc9
Tuba8
Tubb3
Uchl1
Ucp2
Uggt2
Ugt2b34
Unc13b
Unc5b
Upk1a
Upk1b
Usp18
Usp43
Vash1
Vav1
Vcam1
Vcan
Vegfc
Vim
Vipr1
Vldlr
Vnn1
Vsig8
Vsnl1
Vwa1
Vwf
Wbscr17
Wbscr27
Wisp1
Wisp2
Wnt4
Wnt6
Wnt7a
Wnt9a
Xk
Xkrx
Ypel2
Zcchc24
Zdhhc14
Zeb1
Zeb2
Zfp108
Zfp185
Zfp326
Zfp334
Zfp459
Zfp551
Zfp750
Zfr2
Fig. 3EGenelist of cell line tumor clustering (Top 10% most differentially expressed genes)
40971
1110012J17Rik
1110017F19Rik
1110021L09Rik
1110032A04Rik
1110067D22Rik
1190003J15Rik
1300014I06Rik
1700061G19Rik
1810014F10Rik
2010107G23Rik
2010109I03Rik
2200002K05Rik
2210020M01Rik
2310007B03Rik
2310033E01Rik
2310042E22Rik
2310046K01Rik
2610018G03Rik
2610019F03Rik
2610035D17Rik
4732471D19Rik
4833422F24Rik
4833423E24Rik
4930523C07Rik
4930583H14Rik
5031439G07Rik
5430407P10Rik
5730469M10Rik
5730559C18Rik
6030429G01Rik
6230409E13Rik
6330406I15Rik
6430562O15Rik
9530008L14Rik
9530077C05Rik
9930023K05Rik
A130040M12Rik
A230050P20Rik
A4galt
AA986860
Aadacl2
Abca12
Abcg4
Abi3bp
Ablim3
Acap1
Ace2
Acot1
Acsbg1
Acta1
Actg2
Adam12
Adamts12
Adamts15
Adcy3
Add2
Adh1
Adhfe1
Adora2b
Aff3
AI118078
AI467606
AI661453
AI836003
Aif1l
Aim1l
Aim2
Ak4
Akap2
Aknad1
Akr1c12
Akr1c18
Alcam
Aldh1a3
Aldh1a7
Aldh1l1
Aldh3b2
Aldoc
Alox12
Alox12b
Aloxe3
Alpl
Amigo2
Ampd3
Angpt1
Ank1
Ankrd1
Ankrd22
Ano8
Antxr1
Ap1m2
Apbb1ip
Apc2
Aplp1
Apol6
Apol7c
Aqp1
Aqp3
Aqp4
Aqp5
Aqp9
Ar
Areg
Arg1
Arg2
Arhgap24
Arhgap30
Arhgap32
Arhgap33
Arhgap6
Arhgap9
Arhgdig
Arhgef16
Arhgef19
Arhgef4
Armcx2
Arsa
Art4
Arvcf
As3mt
Aspa
Aspn
Asprv1
Ass1
Atp1a3
Atp1b1
Atp2a3
Atp2b4
Atp2c2
Atp6v0a4
Atp6v0e2
Atp7b
Atp8b1
AU018091
Auts2
AW112010
Axl
Bace2
Bai1
Baiap2l1
Baiap3
Bambi
Barx2
Batf2
BC037032
BC048355
BC064078
BC100530
Bcl11a
Bcl11b
Bcl2l14
Bcl2l15
Bdh1
Bdnf
Beta-s
Bicc1
Bmp2
Bmp4
Bmp7
Bmpr1b
Bnc1
Bnipl
Bpifc
Brdt
Bsn
Bspry
Bst2
C130026I21Rik
C1qtnf4
C2
C4a
C4b
C630004H02Rik
Cables1
Cachd1
Cacna1c
Cacna1g
Cacna2d1
Calcb
Calm4
Calml3
Camk2b
Camk2n1
Camsap3
Capns2
Capsl
Car12
Car2
Car7
Car9
Card10
Casc4
Casq2
Casz1
Cblc
Cbr2
Cbs
Ccbl1
Ccdc104
Ccdc141
Ccdc148
Ccdc46
Ccdc64b
Ccdc73
Ccl11
Ccl2
Ccl7
Ccl8
Ccrl2
Cd109
Cd164l2
Cd24a
Cd300ld
Cd34
Cd59a
Cdh1
Cdh2
Cdh3
Cdhr1
Cdk14
Cdk3-ps
Cdk5r1
Cdkn1c
Cdkn2a
Cdkn2b
Cds1
Cdsn
Cdyl
Cdyl2
Ceacam1
Ceacam19
Cebpa
Celsr1
Celsr2
Ces2b
Ces2f
Ces2g
Chdh
Chit1
Chl1
Chmp4c
Chn2
Chrnb1
Chst1
Chst3
Cib2
Cidea
Ckmt1
Clca1
Clca4
Clca5
Cldn1
Cldn3
Cldn7
Clec11a
Clec2g
Clic3
Clip4
Clu
Cmpk2
Cmtm8
Cnfn
Cnn1
Cobl
Col14a1
Col17a1
Col1a2
Col3a1
Cp
Cpe
Cplx2
Cpne5
Cpne8
Cpt1c
Cpxm2
Crb3
Crct1
Cst6
Csta
Cthrc1
Ctnnd2
Cubn
Cwh43
Cxadr
Cxcl10
Cxcl12
Cxcl5
Cxcl9
Cxcr7
Cybrd1
Cyp2b10
Cyp2f2
Cyp2j9
Cyp2r1
Cyp2s1
Cyp39a1
Cyp3a13
Cyp4f39
Cyp7b1
D0H4S114
D730005E14Rik
D830031N03Rik
Daam2
Dagla
Dapk2
Dbndd1
Ddr2
Ddx60
Degs2
Dennd2a
Dennd5b
Deptor
Des
Dhrs3
Dhx58
Disp2
Dkk2
Dkk3
Dlx3
Dmd
Dmkn
Dmpk
Dmrta2
Dmwd
Dnase1l2
Dock3
Dok2
Dok7
Dpep2
Dpt
Dpysl3
Dqx1
Dsc2
Dsc3
Dscc1
Dsg1a
Dsg1b
Dsg2
Dsg3
Dsp
Duox1
Duoxa1
Dusp9
E130012A19Rik
Echdc2
Ednra
Efcab7
Efna3
Efna4
Efnb1
Egln3
Ehf
Eid2
Elf3
Ell3
Elmo3
Eln
Elovl4
Eml1
Emp3
Emr1
Endou
Engase
Enho
Eno2
Eno3
Enox2
Enpp1
Enpp2
Entpd2
Epb4.1l4b
Epcam
Epha1
Ephb2
Ephb3
Ephx3
Epn3
Eps8l1
Espn
Esr1
Esrp2
Evc
Evc2
Evpl
Exph5
Extl1
Eya2
F2rl1
F3
Fa2h
Faah
Fabp5
Fads3
Fahd2a
Fam101b
Fam110c
Fam113b
Fam118a
Fam131c
Fam132b
Fam135a
Fam176a
Fam179a
Fam189a2
Fam189b
Fam198b
Fam25c
Fam38b
Fam40b
Fam57a
Fam59a
Fam83c
Fam83e
Fam83f
Fam83g
Fam83h
Fam84a
Fam84b
Far2
Fat2
Fat4
Fbln1
Fbln2
Fbp2
Fbxl16
Fbxl2
Fcgbp
Fcgr4
Fcho1
Fcna
Fermt1
Fetub
Fgd1
Fgf1
Fgf11
Fgfbp1
Fgfr2
Fgfr3
Fggy
Fhod3
Figf
Fjx1
Fktn
Flnc
Flot2
Flt3
Flt3l
Flywch2
Fmo2
Fmo5
Fmod
Fosl1
Foxc1
Foxq1
Frmd7
Fsd1l
Fstl1
Fundc2
Fut2
Fxyd3
Fyb
Fzd10
Fzd8
Gabrp
Gal3st1
Galk1
Galnt11
Galnt3
Galntl4
Gamt
Gap43
Garnl3
Gbp10
Gbp2
Gbp3
Gbp4
Gbp5
Gbp6
Gbp7
Gbp8
Gbp9
Gchfr
Gcnt1
Gcnt3
Gcnt4
Gde1
Gdf15
Gdnf
Gdpd3
Gfra1
Ggt6
Gin1
Gipc2
Gjb2
Gjb6
Glb1l
Gli2
Glrp1
Glt8d2
Gm12250
Gm16861
Gm4951
Gm5424
Gm5465
Gm5643
Gmpr
Gna15
Gnai1
Gne
Gpa33
Gpc2
Gpc3
Gpc4
Gpr115
Gpr126
Gpr56
Gpr64
Gpr85
Gpr87
Gpx2
Grhl1
Grhl2
Grhl3
Grik5
Grip1
Gsdma
Gsta4
Gsto1
Gstt1
Gvin1
H2afy2
H2-Gs10
H2-Q7
H2-T10
H2-T22
Hap1
Has3
Hebp2
Herc6
Hexim2
Hist1h4j
Hist2h2be
Hmga2
Hmha1
Hoga1
Homer2
Hook1
Hopx
Hoxa7
Hoxb2
Hoxb4
Hoxd9
Hpdl
Hpgd
Hrc
Hrct1
Hs6st2
Hsd17b2
Hspa12a
Hspa1b
Htr2b
Htra1
Hunk
I830012O16Rik
Ifi202b
Ifi203
Ifi205
Ifi47
Igf2
Igfbp2
Igfbp3
Igfbp5
Igj
Igsf10
Igsf3
Igsf9
Igtp
Iigp1
Il11
Il17re
Il18bp
Il1f9
Il1rl2
Il23a
Il24
Il28ra
Il2rb
Il33
Il34
Ildr1
Inadl
Inpp4b
Irf6
Irf7
Irgm2
Irx3
Irx5
Islr
Isyna1
Itga10
Itgb3bp
Itgb6
Itgb7
Itm2a
Jag2
Jup
Kazald1
Kazn
Kcnc3
Kcnip3
Kcnip4
Kcnj15
Kcnk1
Kcnk2
Kcnk7
Kcnn4
Kcnq1
Kcnq5
Kctd14
Kdm5b
Khdrbs3
Kif17
Kif20b
Kif26a
Kif26b
Kitl
Klc3
Klf15
Klhdc8a
Klhdc8b
Klhl22
Klhl23
Klk10
Klk6
Klk7
Klk8
Kprp
Krba1
Krt1
Krt10
Krt13
Krt14
Krt15
Krt16
Krt17
Krt18
Krt19
Krt20
Krt23
Krt4
Krt5
Krt6a
Krt6b
Krt7
Krt78
Krt79
Krt8
Krtcap3
L1cam
Lad1
Lamb3
Lamc2
Lass3
Lat2
Layn
Lcn2
Ldb3
Ldhd
Lgals4
Lgals7
Lgi2
Limk2
Liph
Lipk
Lipm
Lipn
Llgl2
Lmo1
Lnx1
Lor
Loxl4
Lpar4
Lpar5
Lphn2
Lphn3
Lpin3
Lrmp
Lrp3
Lrp4
Lrr1
Lrrc1
Lrrc15
Lrrc8e
Lrrn4cl
Lsr
Ltb4r2
Ltf
Lum
Ly6d
Ly6g6c
Ly6g6e
Lypd3
Lypd6
Lypd6b
Lysmd2
Mab21l3
Macc1
Mal
Mal2
Mall
Mamdc2
Mamld1
Map2k6
Map3k9
Map4k2
Mapk11
Mapk13
Mark1
Marveld2
Marveld3
[truncated: 556 more rows]

## Sheet: Supplemental Table 3
Supplemental Table 3: List of genes (top 10% most differentially expressed genes) used to cluster mouse cell line tumors from Figure 3E
40971
1110012J17Rik
1110017F19Rik
1110021L09Rik
1110032A04Rik
1110067D22Rik
1190003J15Rik
1300014I06Rik
1700061G19Rik
1810014F10Rik
2010107G23Rik
2010109I03Rik
2200002K05Rik
2210020M01Rik
2310007B03Rik
2310033E01Rik
2310042E22Rik
2310046K01Rik
2610018G03Rik
2610019F03Rik
2610035D17Rik
4732471D19Rik
4833422F24Rik
4833423E24Rik
4930523C07Rik
4930583H14Rik
5031439G07Rik
5430407P10Rik
5730469M10Rik
5730559C18Rik
6030429G01Rik
6230409E13Rik
6330406I15Rik
6430562O15Rik
9530008L14Rik
9530077C05Rik
9930023K05Rik
A130040M12Rik
A230050P20Rik
A4galt
AA986860
Aadacl2
Abca12
Abcg4
Abi3bp
Ablim3
Acap1
Ace2
Acot1
Acsbg1
Acta1
Actg2
Adam12
Adamts12
Adamts15
Adcy3
Add2
Adh1
Adhfe1
Adora2b
Aff3
AI118078
AI467606
AI661453
AI836003
Aif1l
Aim1l
Aim2
Ak4
Akap2
Aknad1
Akr1c12
Akr1c18
Alcam
Aldh1a3
Aldh1a7
Aldh1l1
Aldh3b2
Aldoc
Alox12
Alox12b
Aloxe3
Alpl
Amigo2
Ampd3
Angpt1
Ank1
Ankrd1
Ankrd22
Ano8
Antxr1
Ap1m2
Apbb1ip
Apc2
Aplp1
Apol6
Apol7c
Aqp1
Aqp3
Aqp4
Aqp5
Aqp9
Ar
Areg
Arg1
Arg2
Arhgap24
Arhgap30
Arhgap32
Arhgap33
Arhgap6
Arhgap9
Arhgdig
Arhgef16
Arhgef19
Arhgef4
Armcx2
Arsa
Art4
Arvcf
As3mt
Aspa
Aspn
Asprv1
Ass1
Atp1a3
Atp1b1
Atp2a3
Atp2b4
Atp2c2
Atp6v0a4
Atp6v0e2
Atp7b
Atp8b1
AU018091
Auts2
AW112010
Axl
Bace2
Bai1
Baiap2l1
Baiap3
Bambi
Barx2
Batf2
BC037032
BC048355
BC064078
BC100530
Bcl11a
Bcl11b
Bcl2l14
Bcl2l15
Bdh1
Bdnf
Beta-s
Bicc1
Bmp2
Bmp4
Bmp7
Bmpr1b
Bnc1
Bnipl
Bpifc
Brdt
Bsn
Bspry
Bst2
C130026I21Rik
C1qtnf4
C2
C4a
C4b
C630004H02Rik
Cables1
Cachd1
Cacna1c
Cacna1g
Cacna2d1
Calcb
Calm4
Calml3
Camk2b
Camk2n1
Camsap3
Capns2
Capsl
Car12
Car2
Car7
Car9
Card10
Casc4
Casq2
Casz1
Cblc
Cbr2
Cbs
Ccbl1
Ccdc104
Ccdc141
Ccdc148
Ccdc46
Ccdc64b
Ccdc73
Ccl11
Ccl2
Ccl7
Ccl8
Ccrl2
Cd109
Cd164l2
Cd24a
Cd300ld
Cd34
Cd59a
Cdh1
Cdh2
Cdh3
Cdhr1
Cdk14
Cdk3-ps
Cdk5r1
Cdkn1c
Cdkn2a
Cdkn2b
Cds1
Cdsn
Cdyl
Cdyl2
Ceacam1
Ceacam19
Cebpa
Celsr1
Celsr2
Ces2b
Ces2f
Ces2g
Chdh
Chit1
Chl1
Chmp4c
Chn2
Chrnb1
Chst1
Chst3
Cib2
Cidea
Ckmt1
Clca1
Clca4
Clca5
Cldn1
Cldn3
Cldn7
Clec11a
Clec2g
Clic3
Clip4
Clu
Cmpk2
Cmtm8
Cnfn
Cnn1
Cobl
Col14a1
Col17a1
Col1a2
Col3a1
Cp
Cpe
Cplx2
Cpne5
Cpne8
Cpt1c
Cpxm2
Crb3
Crct1
Cst6
Csta
Cthrc1
Ctnnd2
Cubn
Cwh43
Cxadr
Cxcl10
Cxcl12
Cxcl5
Cxcl9
Cxcr7
Cybrd1
Cyp2b10
Cyp2f2
Cyp2j9
Cyp2r1
Cyp2s1
Cyp39a1
Cyp3a13
Cyp4f39
Cyp7b1
D0H4S114
D730005E14Rik
D830031N03Rik
Daam2
Dagla
Dapk2
Dbndd1
Ddr2
Ddx60
Degs2
Dennd2a
Dennd5b
Deptor
Des
Dhrs3
Dhx58
Disp2
Dkk2
Dkk3
Dlx3
Dmd
Dmkn
Dmpk
Dmrta2
Dmwd
Dnase1l2
Dock3
Dok2
Dok7
Dpep2
Dpt
Dpysl3
Dqx1
Dsc2
Dsc3
Dscc1
Dsg1a
Dsg1b
Dsg2
Dsg3
Dsp
Duox1
Duoxa1
Dusp9
E130012A19Rik
Echdc2
Ednra
Efcab7
Efna3
Efna4
Efnb1
Egln3
Ehf
Eid2
Elf3
Ell3
Elmo3
Eln
Elovl4
Eml1
Emp3
Emr1
Endou
Engase
Enho
Eno2
Eno3
Enox2
Enpp1
Enpp2
Entpd2
Epb4.1l4b
Epcam
Epha1
Ephb2
Ephb3
Ephx3
Epn3
Eps8l1
Espn
Esr1
Esrp2
Evc
Evc2
Evpl
Exph5
Extl1
Eya2
F2rl1
F3
Fa2h
Faah
Fabp5
Fads3
Fahd2a
Fam101b
Fam110c
Fam113b
Fam118a
Fam131c
Fam132b
Fam135a
Fam176a
Fam179a
Fam189a2
Fam189b
Fam198b
Fam25c
Fam38b
Fam40b
Fam57a
Fam59a
Fam83c
Fam83e
Fam83f
Fam83g
Fam83h
Fam84a
Fam84b
Far2
Fat2
Fat4
Fbln1
Fbln2
Fbp2
Fbxl16
Fbxl2
Fcgbp
Fcgr4
Fcho1
Fcna
Fermt1
Fetub
Fgd1
Fgf1
Fgf11
Fgfbp1
Fgfr2
Fgfr3
Fggy
Fhod3
Figf
Fjx1
Fktn
Flnc
Flot2
Flt3
Flt3l
Flywch2
Fmo2
Fmo5
Fmod
Fosl1
Foxc1
Foxq1
Frmd7
Fsd1l
Fstl1
Fundc2
Fut2
Fxyd3
Fyb
Fzd10
Fzd8
Gabrp
Gal3st1
Galk1
Galnt11
Galnt3
Galntl4
Gamt
Gap43
Garnl3
Gbp10
Gbp2
Gbp3
Gbp4
Gbp5
Gbp6
Gbp7
Gbp8
Gbp9
Gchfr
Gcnt1
Gcnt3
Gcnt4
Gde1
Gdf15
Gdnf
Gdpd3
Gfra1
Ggt6
Gin1
Gipc2
Gjb2
Gjb6
Glb1l
Gli2
Glrp1
Glt8d2
Gm12250
Gm16861
Gm4951
Gm5424
Gm5465
Gm5643
Gmpr
Gna15
Gnai1
Gne
Gpa33
Gpc2
Gpc3
Gpc4
Gpr115
Gpr126
Gpr56
Gpr64
Gpr85
Gpr87
Gpx2
Grhl1
Grhl2
Grhl3
Grik5
Grip1
Gsdma
Gsta4
Gsto1
Gstt1
Gvin1
H2afy2
H2-Gs10
H2-Q7
H2-T10
H2-T22
Hap1
Has3
Hebp2
Herc6
Hexim2
Hist1h4j
Hist2h2be
Hmga2
Hmha1
Hoga1
Homer2
Hook1
Hopx
Hoxa7
Hoxb2
Hoxb4
Hoxd9
Hpdl
Hpgd
Hrc
Hrct1
Hs6st2
Hsd17b2
Hspa12a
Hspa1b
Htr2b
Htra1
Hunk
I830012O16Rik
Ifi202b
Ifi203
Ifi205
Ifi47
Igf2
Igfbp2
Igfbp3
Igfbp5
Igj
Igsf10
Igsf3
Igsf9
Igtp
Iigp1
Il11
Il17re
Il18bp
Il1f9
Il1rl2
Il23a
Il24
Il28ra
Il2rb
Il33
Il34
Ildr1
Inadl
Inpp4b
Irf6
Irf7
Irgm2
Irx3
Irx5
Islr
Isyna1
Itga10
Itgb3bp
Itgb6
Itgb7
Itm2a
Jag2
Jup
Kazald1
Kazn
Kcnc3
Kcnip3
Kcnip4
Kcnj15
Kcnk1
Kcnk2
Kcnk7
Kcnn4
Kcnq1
Kcnq5
Kctd14
Kdm5b
Khdrbs3
Kif17
Kif20b
Kif26a
Kif26b
Kitl
Klc3
Klf15
Klhdc8a
Klhdc8b
Klhl22
Klhl23
Klk10
Klk6
Klk7
Klk8
Kprp
Krba1
Krt1
Krt10
Krt13
Krt14
Krt15
Krt16
Krt17
Krt18
Krt19
Krt20
Krt23
Krt4
Krt5
Krt6a
Krt6b
Krt7
Krt78
Krt79
Krt8
Krtcap3
L1cam
Lad1
Lamb3
Lamc2
Lass3
Lat2
Layn
Lcn2
Ldb3
Ldhd
Lgals4
Lgals7
Lgi2
Limk2
Liph
Lipk
Lipm
Lipn
Llgl2
Lmo1
Lnx1
Lor
Loxl4
Lpar4
Lpar5
Lphn2
Lphn3
Lpin3
Lrmp
Lrp3
Lrp4
Lrr1
Lrrc1
Lrrc15
Lrrc8e
Lrrn4cl
Lsr
Ltb4r2
Ltf
Lum
Ly6d
Ly6g6c
Ly6g6e
Lypd3
Lypd6
Lypd6b
Lysmd2
Mab21l3
Macc1
Mal
Mal2
Mall
Mamdc2
Mamld1
Map2k6
Map3k9
Map4k2
Mapk11
Mapk13
Mark1
Marveld2
Marveld3
Mboat2
Mcpt1
Mctp2
Mdfi
Mdga1
Me1
Mecom
Megf6
Meis1
Meis2
Mest
Mfap3l
Mfng
Mfsd2a
Mgat3
Mgat5b
Mgp
Mgst2
Mia2
Mical3
Mlph
Mmp10
Mmp15
Mmp17
Mmp2
Mmp7
Moxd1
Mpped2
Mpzl2
Mpzl3
Mr1
Mras
Mrc1
Mrc2
Mreg
Mrps11
Msln
Msr1
Msrb2
Mst1r
Msx1
Msx2
Msx3
Mtap1b
Mtap1s
Mtap2
Mtap7
Mtus1
Mtus2
Muc20
Muc4
Myb
Mybl1
Mycl1
Myef2
Myh14
Myl6b
Myl9
Mylpf
Myo1b
Myo1d
Myo5b
Myzap
Naip6
Naprt1
Nat8l
Nav3
Nbea
Ncald
Nccrp1
Nckap5
Ndn
Ndufa4l2
Nebl
Neto2
Neurl1a
Nexn
Nfe2l3
Nfkbie
Ngef
Ngf
Nid1
Ninl
Nipal2
Nipal4
Nkd1
Nkd2
Nkpd1
Nlrc5
Nlrp10
Nos2
Notch3
Npas2
Npcd
Npnt
Npr2
Npr3
Npy1r
Nqo1
Nr2f1
Nradd
Nrtn
Nsg1
Ntn1
Nudt7
Nup210
Nup50
Nxph4
Oas1a
Oas1g
Oas2
Oas3
Obsl1
Odz3
Ogdhl
Olfm1
Olr1
Omp
Oplah
Opn3
Osbpl6
Ovol1
P4ha3
Padi3
Palld
Palmd
Pamr1
Pard3
Pard6g
Parm1
Parp3
Parvb
Pcbd1
Pcdh19
Pcdhb12
Pcdhb14
Pcdhb16
Pcdhb17
Pcdhb18
Pcdhb20
Pcdhb7
Pcdhb9
Pcdhgb6
Pcgf5
Pclo
Pcolce2
Pcsk6
Pcsk9
Pcx
Pdcd4
Pde2a
Pde4a
Pdlim4
Pdzd2
Pdzk1ip1
Perp
Pgap1
Pgbd1
Pgbd5
Pglyrp4
Phactr1
Phf19
Phlda2
Phlda3
Phospho1
Pi15
Pik3r3
Pik3r5
Pitpnm3
Pitx1
Pkp1
Pkp2
Pla2g4e
Pla2g4f
Plag1
Plagl1
Plcd1
Plce1
Plch2
Plcl2
Plekhg1
Plekhg6
Plekhh2
Pls1
Plscr4
Plxdc2
Plxnb1
Pm20d2
Pmepa1
Podxl
Pof1b
Pou3f1
Ppbp
Ppfia3
Ppfibp2
Ppm1e
Ppp1r2-ps3
Ppp2r1b
Ppp2r2c
Pramef12
Prickle2
Prkd1
Prkg2
Prl2c3
Prom1
Prom2
Prss12
Prss22
Prss27
Prss32
Prss53
Prune2
Psapl1
Psca
Psmb9
Ptgir
Pthlh
Ptk7
Ptpn13
Ptpn22
Ptprcap
Ptprd
Ptprf
Ptprn
Ptpru
Pvrl1
Pvrl4
Pygm
Pyroxd2
Qsox1
Rab15
Rab25
Rab38
Rab40b
Rab6b
Rabgap1l
Rac3
Raet1e
Ranbp17
Rapgef5
Rapgefl1
Rarb
Rasgef1a
Rasgrp3
Rassf10
Rassf9
Raver2
Rbm20
Rbp1
Rcn3
Rdh12
Rdm1
Reep6
Rell2
Renbp
Repin1
Reps2
Rerg
Rftn2
Rgs4
Rhov
Rhpn2
Ripk4
Rnf122
Rnf125
Rnf128
Rnf144b
Rnf208
Rnf39
Rnf43
Robo1
Ror2
Rpgrip1
Rprl1
Rps6ka2
Rptn
Rpusd3
Rsad2
Rsph1
Rtkn2
Rundc3a
S100a14
S100a4
S100a8
S1pr5
Saa3
Samd14
Sbsn
Scara3
Scara5
Scarf2
Scel
Scin
Scnn1a
Scnn1g
Sdcbp2
Sdpr
Sdr42e1
Sdr9c7
Sel1l3
Selenbp1
Sell
Sema3a
Sema3b
Sema3e
Sema4g
Sema5a
Serinc2
Serinc5
Serpina3n
Serpinb10-ps
Serpinb1b
Serpinb2
Serpinb5
Serpinb9b
Sesn3
Setbp1
Sfn
Sfrp1
Sfrp2
Sgms2
Sh2d4a
Sh3gl2
Sh3rf2
Sh3yl1
Shisa4
Shroom2
Sidt1
Sigirr
Siglec1
Skint3
Slamf8
Slc10a6
Slc12a4
Slc14a1
Slc16a14
Slc16a2
Slc16a9
Slc17a9
Slc1a1
Slc25a23
Slc25a30
Slc25a35
Slc2a3
Slc2a5
Slc34a2
Slc35f2
Slc39a4
Slc40a1
Slc43a3
Slc4a11
Slc4a4
Slc5a1
Slc5a8
Slc9a4
Slco1a5
Slco5a1
Slfn8
Slit2
Slitrk6
Smarca1
Smtnl2
Snai1
Snord123
Sntb1
Sorbs2
Sorbs3
Sorcs2
Sorl1
Sox11
Sox12
Sox4
Sox6
Sox7
Sp110
Sp140
Sp6
Spa17
Spats2
Spdef
Spink5
Spire2
Spn
Spnb3
Spon2
Sprr1a
Sprr1b
Sprr2a1
Sprr2d
Sprr2f
Sprr2g
Sprr2h
Sprr2k
Sprr3
Sptlc3
Srgap1
Srgap3
Ssbp2
St14
St3gal6
St6galnac2
St6galnac4
St8sia1
Stac2
Stard10
Stc2
Stfa3
Stox2
Stra6
Sult4a1
Susd1
Syt16
Syt7
Sytl1
Tacstd2
Tanc2
Tap1
Tbx2
Tcf7l1
Tchh
Tead2
Tex15
Tgfbr3
Tgm1
Tgm5
Tgtp2
Thbd
Thbs2
Thbs3
Thnsl2
Thrb
Thsd4
Thsd7a
Tiam1
Tigit
Tjp3
Tll1
Tlr9
Tm4sf1
Tm6sf1
Tmc3
Tmc4
Tmc7
Tmeff1
Tmem116
Tmem119
Tmem150c
Tmem151a
Tmem154
Tmem171
Tmem184a
Tmem20
Tmem26
Tmem30b
Tmem40
Tmem44
Tmem45a
Tmem45b
Tmem54
Tmem79
Tmem98
Tmod2
Tmprss11a
Tmprss11bnl
Tmprss11d
Tmprss11e
Tmprss11g
Tmprss13
Tmprss4
Tmtc1
Tmtc2
Tnfrsf11b
Tnfrsf19
Tnfsf13b
Tnik
Tnni2
Tns4
Tpd52l1
Tprg
Tpt1
Traf1
Traf3
Tril
Trim29
Trim62
Trp53
Trp63
Trp73
Trpm6
Trps1
Tshz2
Tshz3
Tspan15
Tspan17
Tspan18
Tspan6
Tspan7
Tspan8
Ttc12
Ttc9
Tuba8
Tubb2a-ps2
Tubb3
Twist1
Ubd
Uchl1
Ugt1a1
Ugt1a6a
Ugt2b34
Unc13b
Unc13d
Upk1b
Uroc1
Ust
Vcam1
Vcan
Vim
Vipr1
Vldlr
Vnn1
Vsig8
Vsnl1
Wbscr17
Wbscr27
Wfikkn1
Wisp2
Wnk2
Wnt11
Wnt4
Wnt5a
Xkr5
Xpnpep2
Zbp1
Zbtb10
Zbtb20
Zbtb32
Zc4h2
Zcwpw1
Zdhhc2
Zdhhc23
Zfp185
Zfp2
Zfp326
Zfp354c
Zfp365
Zfp422
Zfp467
Zfp518b
Zfp57
Zfp580
Zfp608
Zfp704
Zfp750
Zfp862
Zfp937
Zmat1

## Sheet: Supplemental Table 4
Supplemntal Table 4. Class I predicted neoantigens
Model	Variant peptide amino acid sequence	Reference peptide amino acid sequence	Variant peptide DNA coding sequence	Reference peptide DNA coding sequence	number of mutations	Genomic coordinates of coding DNA sequence	Exon(s) included	Gene identification	coverage_support	genomic_position_coverage	exome_coverage	H-2-DbNm	H-2-Dbbinding property	H-2-KbNm	H-2-Kbbinding property
BBN963	SNVMQLLL	SDVMQLLL	TCAAATGTGATGCAGCTATTGTTG	TCAGATGTGATGCAGCTATTGTTG	1	chr14[(121335659, 121335682)]	ENSMUST00000164092.1[10]	Ipo5	48	136	91	10211.3	non-binders	244.528	weak binders
BBN963	NVKSFLFQL	IVKSFLFQL	AATGTGAAGTCATTCCTCTTCCAGCTG	ATTGTGAAGTCATTCCTCTTCCAGCTG	1	chr5[(23928158, 23928150), (23926868, 23926851)]	ENSMUST00000030814.6[7, 6]	Cdk5	21	77	66	24068.4	non-binders	412.745	weak binders
BBN963	TLFSSWLSSL	SLFSSWLSSL	ACACTGTTCTCATCTTGGCTGTCATCATTG	TCACTGTTCTCATCTTGGCTGTCATCATTG	1	chr7[(134992114, 134992143)]	ENSMUST00000121705.1[9]	Stx4a	148	233	40	8917.53	non-binders	148.343	moderate binders
BBN963	KVFSLNVVNL	KVFSPNVVNL	AAGGTTTTCTCGCTCAACGTTGTCAACCTG	AAGGTTTTCTCGCCCAACGTTGTCAACCTG	1	chr16[(16338745, 16338716)]	ENSMUST00000023477.7[13]	Dnm1l	19	19	86	3343.21	non-binders	267.502	weak binders
BBN963	KAMATMEI	KAMATMDI	AAGGCTATGGCAACTATGGAAATA	AAGGCTATGGCAACTATGGATATA	1	chr5[(100392851, 100392828)]	ENSMUST00000167035.1[1]	Hnrnpd	206	400	35	387.94	weak binders	3751.74	non-binders
BBN963	FTFTSFWAYKI	FIFTSFWAYKI	TTCACCTTCACGTCCTTCTGGGCATATAAGATC	TTCATCTTCACGTCCTTCTGGGCATATAAGATC	1	chr19[(41292802, 41292770)]	ENSMUST00000164316.1[2]	Tm9sf3	139	288	51	3469.59	non-binders	498.078	weak binders
BBN963	VMISRNRHTL	VMISCNRHTL	GTGATGATCTCCCGCAATCGGCACACACTA	GTGATGATCTCCTGCAATCGGCACACACTA	1	chr6[(122265152, 122265181)]	ENSMUST00000112610.1[2]	M6pr	76	195	60	527.641	non-binders	82.0806	moderate binders
BBN963	MMLKNVGFAL	LMLKNVGFAL	ATGATGCTGAAAAATGTGGGCTTTGCATTG	TTGATGCTGAAAAATGTGGGCTTTGCATTG	1	chr5[(29766567, 29766596)]	ENSMUST00000001611.9[3]	Nom1	43	147	60	124.841	moderate binders	682.882	non-binders
BBN963	AAMVTWTLRM	AAMVTWTLRL	GCTGCAATGGTGACCTGGACCCTGAGAATG	GCTGCAATGGTGACCTGGACCCTGAGATTG	1	chr5[(23928184, 23928155)]	ENSMUST00000030814.6[7]	Cdk5	21	77	66	444.77	weak binders	344.151	weak binders
BBN963	MISRNRHTL	MISCNRHTL	ATGATCTCCCGCAATCGGCACACACTA	ATGATCTCCTGCAATCGGCACACACTA	1	chr6[(122265155, 122265181)]	ENSMUST00000112610.1[2]	M6pr	76	195	60	442.396	weak binders	2563.12	non-binders
BBN963	GMAVRALNM	GMAVRELNM	GGGATGGCTGTCAGGGCGTTGAATATG	GGGATGGCTGTCAGGGAGTTGAATATG	1	chr12[(97018138, 97018164)]	ENSMUST00000169836.1[0]	Flrt2	30	30	44	13091	non-binders	414.988	weak binders
BBN963	NVKSFLFQLL	IVKSFLFQLL	AATGTGAAGTCATTCCTCTTCCAGCTGCTG	ATTGTGAAGTCATTCCTCTTCCAGCTGCTG	1	chr5[(23928158, 23928150), (23926868, 23926848)]	ENSMUST00000030814.6[7, 6]	Cdk5	21	77	66	25062.2	non-binders	358.516	weak binders
BBN963	MVYGRFQCI	MVNGRFQCI	ATGGTGTACGGAAGGTTCCAGTGCATT	ATGGTGAACGGAAGGTTCCAGTGCATT	1	chr1[(71294971, 71294945)]	ENSMUST00000087268.5[3]	Abca12	50	50	39	20130.2	non-binders	45.7207	strong binders
BBN963	VSLTLFSSWL	VSLSLFSSWL	GTGTCTCTGACACTGTTCTCATCTTGGCTG	GTGTCTCTGTCACTGTTCTCATCTTGGCTG	1	chr7[(134992105, 134992134)]	ENSMUST00000121705.1[9]	Stx4a	148	233	40	2444.29	non-binders	52.2863	moderate binders
BBN963	VVMISRNRHTL	VVMISCNRHTL	GTGGTGATGATCTCCCGCAATCGGCACACACTA	GTGGTGATGATCTCCTGCAATCGGCACACACTA	1	chr6[(122265149, 122265181)]	ENSMUST00000112610.1[2]	M6pr	76	195	60	606.278	non-binders	470.754	weak binders
BBN963	QSISRFSRSTL	QSISRFSRPTL	CAATCCATCTCAAGGTTTTCTCGCTCAACGTTG	CAATCCATCTCAAGGTTTTCTCGCCCAACGTTG	1	chr16[(16338756, 16338724)]	ENSMUST00000023477.7[13]	Dnm1l	19	19	86	3183.57	non-binders	98.7187	moderate binders
BBN963	INMLYGII	INMLYGTI	ATCAACATGTTGTATGGAATCATT	ATCAACATGTTGTATGGAACCATT	1	chr6[(83282468, 83282491)]	ENSMUST00000101245.2[2]	Mob1a	101	159	51	16904.7	non-binders	277.733	weak binders
BBN963	MYFTFTSF	MYFIFTSF	ATGTACTTCACCTTCACGTCCTTC	ATGTACTTCATCTTCACGTCCTTC	1	chr19[(41295728, 41295727), (41292806, 41292785)]	ENSMUST00000164316.1[3, 2]	Tm9sf3	139	288	51	11216	non-binders	210.772	weak binders
BBN963	MAVRALNMNLL	MAVRELNMNLL	ATGGCTGTCAGGGCGTTGAATATGAATCTTTTG	ATGGCTGTCAGGGAGTTGAATATGAATCTTTTG	1	chr12[(97018141, 97018173)]	ENSMUST00000169836.1[0]	Flrt2	30	30	44	282.098	weak binders	431.926	weak binders
BBN963	ISWKTWINL	ISWITWINL	ATTTCTTGGAAAACTTGGATAAACTTG	ATTTCTTGGATAACTTGGATAAACTTG	1	chr11[(109253676, 109253702)]	ENSMUST00000020930.7[2]	Gna13	32	68	76	8658.56	non-binders	245.593	weak binders
BBN963	IAICVSDTV	IAICVSVTV	ATTGCCATCTGTGTCTCTGACACTGTT	ATTGCCATCTGTGTCTCTGTCACTGTT	1	chr7[(134992095, 134992121)]	ENSMUST00000121705.1[9]	Stx4a	148	233	40	499.471	weak binders	3180.05	non-binders
BBN963	SMGSNDSDTL	SMGSNDIDTL	AGCATGGGATCCAACGACAGTGATACACTA	AGCATGGGATCCAACGACATTGATACACTA	1	chr3[(57600189, 57600207), (57606369, 57606379)]	ENSMUST00000164492.1[3, 4]	Rnf13	41	123	57	442.171	weak binders	7313.96	non-binders
BBN963	ITVSCRHYTAF	TTVSCRHYTAF	ATCACAGTTAGCTGCAGACATTACACAGCTTTC	ACCACAGTTAGCTGCAGACATTACACAGCTTTC	1	chr5[(8397730, 8397698)]	ENSMUST00000171808.1[0]	Dbf4	167	217	55	6427.54	non-binders	256.918	weak binders
BBN963	SHFLCYTL	SHSLCYTL	TCACATTTCCTGTGTTACACTCTG	TCACATTCCCTGTGTTACACTCTG	1	chr11[(69788606, 69788583)]	ENSMUST00000108595.2[1]	Rai12	106	157	35	6584.11	non-binders	155.125	weak binders
BBN963	VMISRNRHTLA	VMISCNRHTLA	GTGATGATCTCCCGCAATCGGCACACACTAGCG	GTGATGATCTCCTGCAATCGGCACACACTAGCG	1	chr6[(122265152, 122265184)]	ENSMUST00000112610.1[2]	M6pr	76	195	60	14700.7	non-binders	416.888	weak binders
BBN963	LMMLKNVGF	LLMLKNVGF	CTGATGATGCTGAAAAATGTGGGCTTT	CTGTTGATGCTGAAAAATGTGGGCTTT	1	chr5[(29766564, 29766590)]	ENSMUST00000001611.9[3]	Nom1	43	147	60	21877.7	non-binders	479.756	weak binders
BBN963	YFLENLDKL	YFLDNLDKL	TATTTCTTGGAAAACTTGGATAAACTT	TATTTCTTGGATAACTTGGATAAACTT	1	chr11[(109253675, 109253701)]	ENSMUST00000020930.7[2]	Gna13	32	68	76	105.684	moderate binders	4244.58	non-binders
BBN963	ETLLNSATI	ETLLNSATT	GAAACTTTGTTAAATAGCGCAACTATT	GAAACTTTGTTAAATAGCGCAACTACT	1	chr11[(22896416, 22896442)]	ENSMUST00000020562.4[3]	Cct4	127	281	63	412.807	weak binders	4011.45	non-binders
BBN963	VALLPSVML	VALFPSVML	GTTGCTCTGTTACCCTCAGTAATGTTG	GTTGCTCTGTTTCCCTCAGTAATGTTG	1	chr1[(151677267, 151677241)]	ENSMUST00000111926.2[0]	Pla2g4a	75	152	56	5897.33	non-binders	493.962	weak binders
BBN963	SSPYLHQHLL	PSPYLHQHLL	TCTTCTCCATATTTGCACCAACACCTACTG	CCTTCTCCATATTTGCACCAACACCTACTG	1	chr11[(29056867, 29056896)]	ENSMUST00000020756.8[23]	Pnpt1	115	137	62	1493.06	non-binders	140.241	moderate binders
BBN963	SIFIEMYFTF	SIFIEMYFIF	TCAATCTTTATTGAAATGTACTTCACCTTC	TCAATCTTTATTGAAATGTACTTCATCTTC	1	chr19[(41295743, 41295727), (41292806, 41292794)]	ENSMUST00000164316.1[3, 2]	Tm9sf3	139	288	51	10315.4	non-binders	486.933	weak binders
BBN963	SVKYFLENL	SVKYFLDNL	TCTGTAAAGTATTTCTTGGAAAACTTG	TCTGTAAAGTATTTCTTGGATAACTTG	1	chr11[(109253666, 109253692)]	ENSMUST00000020930.7[2]	Gna13	32	68	76	22624.7	non-binders	174.034	weak binders
BBN963	INMLYGIITEF	INMLYGTITEF	ATCAACATGTTGTATGGAATCATTACAGAATTC	ATCAACATGTTGTATGGAACCATTACAGAATTC	1	chr6[(83282468, 83282500)]	ENSMUST00000101245.2[2]	Mob1a	101	159	51	19120.1	non-binders	293.384	weak binders
BBN963	NGYCHLCPSSF	NGFCHLCPSSF	AACGGCTACTGTCATCTATGTCCCTCCTCCTTT	AACGGCTTCTGTCATCTATGTCCCTCCTCCTTT	1	chr6[(73213822, 73213854)]	ENSMUST00000171513.1[3]	Suclg1	114	200	70	14347.8	non-binders	396.354	weak binders
BBN963	LMMLKNVGFAL	LLMLKNVGFAL	CTGATGATGCTGAAAAATGTGGGCTTTGCATTG	CTGTTGATGCTGAAAAATGTGGGCTTTGCATTG	1	chr5[(29766564, 29766596)]	ENSMUST00000001611.9[3]	Nom1	43	147	60	4518.75	non-binders	396.124	weak binders
BBN963	SSPYLHQHL	PSPYLHQHL	TCTTCTCCATATTTGCACCAACACCTA	CCTTCTCCATATTTGCACCAACACCTA	1	chr11[(29056867, 29056893)]	ENSMUST00000020756.8[23]	Pnpt1	115	137	62	4808.29	non-binders	308.367	weak binders
BBN963	KTKTWYTKL	YTKTWYTKL	AAGACAAAAACGTGGTACACAAAACTG	TATACAAAAACGTGGTACACAAAACTG	2	chr2[(146855492, 146855518)]	ENSMUST00000028921.5[11]	Xrn2	64	206	58	23644.5	non-binders	343.507	weak binders
BBN963	ISRNRHTL	ISCNRHTL	ATCTCCCGCAATCGGCACACACTA	ATCTCCTGCAATCGGCACACACTA	1	chr6[(122265158, 122265181)]	ENSMUST00000112610.1[2]	M6pr	76	195	60	8553.43	non-binders	483.468	weak binders
BBN963	VSHFLCYTL	VSHSLCYTL	GTGTCACATTTCCTGTGTTACACTCTG	GTGTCACATTCCCTGTGTTACACTCTG	1	chr11[(69788609, 69788583)]	ENSMUST00000108595.2[1]	Rai12	106	157	35	2764.91	non-binders	172.407	weak binders
BBN963	WLYIPTSLL	WLHIPTSLL	TGGTTGTACATTCCAACATCTTTGTTG	TGGTTGCACATTCCAACATCTTTGTTG	1	chr7[(133700959, 133700933)]	ENSMUST00000032992.4[9]	Eif3c	159	265	42	19855.2	non-binders	355.224	weak binders
BBN963	AAVSHFLCYTL	AAVSHSLCYTL	GCTGCTGTGTCACATTTCCTGTGTTACACTCTG	GCTGCTGTGTCACATTCCCTGTGTTACACTCTG	1	chr11[(69788615, 69788583)]	ENSMUST00000108595.2[1]	Rai12	106	157	35	545.848	non-binders	210.925	weak binders
BBN963	FSLNVVNLTLV	FSPNVVNLTLV	TTCTCGCTCAACGTTGTCAACCTGACACTTGTG	TTCTCGCCCAACGTTGTCAACCTGACACTTGTG	1	chr16[(16338739, 16338707)]	ENSMUST00000023477.7[13]	Dnm1l	19	19	86	495.953	weak binders	1068.46	non-binders
BBN963	RALNMNLL	RELNMNLL	AGGGCGTTGAATATGAATCTTTTG	AGGGAGTTGAATATGAATCTTTTG	1	chr12[(97018150, 97018173)]	ENSMUST00000169836.1[0]	Flrt2	30	30	44	310.041	weak binders	855.741	non-binders
BBN963	FSLNVVNL	FSPNVVNL	TTCTCGCTCAACGTTGTCAACCTG	TTCTCGCCCAACGTTGTCAACCTG	1	chr16[(16338739, 16338716)]	ENSMUST00000023477.7[13]	Dnm1l	19	19	86	823.928	non-binders	487.142	weak binders
BBN963	LAIMVYGRF	LAIMVNGRF	CTGGCCATTATGGTGTACGGAAGGTTC	CTGGCCATTATGGTGAACGGAAGGTTC	1	chr1[(71294980, 71294954)]	ENSMUST00000087268.5[3]	Abca12	50	50	39	19215.7	non-binders	480.608	weak binders
BBN963	EMYFTFTSF	EMYFIFTSF	GAAATGTACTTCACCTTCACGTCCTTC	GAAATGTACTTCATCTTCACGTCCTTC	1	chr19[(41295731, 41295727), (41292806, 41292785)]	ENSMUST00000164316.1[3, 2]	Tm9sf3	139	288	51	23457.5	non-binders	225.102	weak binders
BBN963	AMVTWTLRM	AMVTWTLRL	GCAATGGTGACCTGGACCCTGAGAATG	GCAATGGTGACCTGGACCCTGAGATTG	1	chr5[(23928181, 23928155)]	ENSMUST00000030814.6[7]	Cdk5	21	77	66	6356.18	non-binders	335.173	weak binders
BBN963	HTLPRMLL	HTLPWMLL	CATACCTTACCAAGGATGCTTCTG	CATACCTTACCATGGATGCTTCTG	1	chr18[(35102923, 35102900)]	ENSMUST00000025217.8[7]	Hspa9	457	829	44	9852.55	non-binders	255.655	weak binders
MB49	TSQHLYRLWLL	TSQHLYRMWLL	ACCAGTCAGCACCTATACAGATTGTGGCTCCTG	ACCAGTCAGCACCTATACAGAATGTGGCTCCTG	1	chr4[(88049275, 88049307)]	ENSMUST00000107147.1[1]	BC057079	38	38	53	14682.4	non-binders	375.867	weak binders
MB49	SSISIHQIHLI	SSISIHQIHLV	TCTTCAATTTCAATTCATCAAATACATCTCATC	TCTTCAATTTCAATTCATCAAATACATCTCGTC	1	chr10[(43717147, 43717115)]	ENSMUST00000099866.2[18]	Aim1	122	135	47	954.452	non-binders	468.84	weak binders
MB49	YSYFLSLPNQL	YSYSLSLPNQL	TATTCCTACTTTTTATCACTTCCCAACCAACTG	TATTCCTACTCTTTATCACTTCCCAACCAACTG	1	chr12[(16984449, 16984481)]	ENSMUST00000168024.1[23]	Rock2	270	303	42	1708.29	non-binders	67.3451	moderate binders
MB49	SSILYVKSLL	SAILYVKSLL	AGCTCAATCCTGTACGTGAAATCCCTGCTG	AGCGCAATCCTGTACGTGAAATCCCTGCTG	1	chr2[(83641990, 83642019)]	ENSMUST00000111740.2[24]	Itgav	117	124	50	3273.53	non-binders	91.231	moderate binders
MB49	SQHLYRLWLL	SQHLYRMWLL	AGTCAGCACCTATACAGATTGTGGCTCCTG	AGTCAGCACCTATACAGAATGTGGCTCCTG	1	chr4[(88049278, 88049307)]	ENSMUST00000107147.1[1]	BC057079	38	38	53	3325.23	non-binders	162.123	weak binders
MB49	ATYIHPTMLL	ATYIYPTMLL	GCTACGTACATACACCCGACAATGCTTTTG	GCTACGTACATATACCCGACAATGCTTTTG	1	chr18[(70629126, 70629103), (70628171, 70628166)]	ENSMUST00000067556.3[6, 5]	4930503L19Rik	80	97	20	6292.71	non-binders	50.7926	moderate binders
MB49	TQFPRRHL	TQFPRRRL	ACCCAATTTCCACGCAGACACTTA	ACCCAATTTCCACGCAGACGCTTA	1	chr11[(48909320, 48909343)]	ENSMUST00000046704.6[0]	Ifi47	189	236	33	17967.5	non-binders	263.882	weak binders
MB49	VMDSWCCYLKL	GMDSWCCYLKL	GTGATGGATTCATGGTGTTGCTATCTAAAATTG	GGGATGGATTCATGGTGTTGCTATCTAAAATTG	1	chr4[(99465393, 99465387), (99456370, 99456345)]	ENSMUST00000146258.1[4, 3]	Itgb3bp	51	57	21	13776.4	non-binders	377.412	weak binders
MB49	SSYVHTPDNAF	SSYVHIPDNAF	TCCAGCTACGTACATACACCCGACAATGCTTTT	TCCAGCTACGTACATATACCCGACAATGCTTTT	1	chr18[(70629130, 70629103), (70628171, 70628167)]	ENSMUST00000067556.3[6, 5]	4930503L19Rik	80	97	20	4261.14	non-binders	76.4385	moderate binders
MB49	RIFLISNL	CIFLISNL	CGCATCTTCCTGATCTCCAACTTG	TGCATCTTCCTGATCTCCAACTTG	1	chr11[(48909600, 48909623)]	ENSMUST00000046704.6[0]	Ifi47	117	165	24	18049.7	non-binders	214.394	weak binders
MB49	ATYIHPTM	ATYIYPTM	GCTACGTACATACACCCGACAATG	GCTACGTACATATACCCGACAATG	1	chr18[(70629126, 70629103)]	ENSMUST00000067556.3[6]	4930503L19Rik	80	97	20	3193.35	non-binders	75.9022	moderate binders
MB49	FNFNSSNTSHL	FNFNSSNTSRL	TTCAATTTCAATTCATCAAATACATCTCATCTG	TTCAATTTCAATTCATCAAATACATCTCGTCTG	1	chr10[(43717145, 43717113)]	ENSMUST00000099866.2[18]	Aim1	122	135	47	3757.17	non-binders	188.281	weak binders
MB49	VMDSWCCYL	GMDSWCCYL	GTGATGGATTCATGGTGTTGCTATCTA	GGGATGGATTCATGGTGTTGCTATCTA	1	chr4[(99465393, 99465387), (99456370, 99456351)]	ENSMUST00000146258.1[4, 3]	Itgb3bp	51	57	21	10778	non-binders	462.753	weak binders
MB49	STFAIHLLKML	GTFAIHLLKML	AGCACCTTTGCCATCCATCTATTGAAGATGTTA	GGCACCTTTGCCATCCATCTATTGAAGATGTTA	1	chr13[(33121355, 33121387)]	ENSMUST00000006392.2[0]	Serpinb9b	41	53	35	12467.2	non-binders	128.648	moderate binders
MB49	STFAIHLL	GTFAIHLL	AGCACCTTTGCCATCCATCTATTG	GGCACCTTTGCCATCCATCTATTG	1	chr13[(33121355, 33121378)]	ENSMUST00000006392.2[0]	Serpinb9b	41	53	35	3775.99	non-binders	67.0868	moderate binders
MB49	HLYRLWLLKRL	HLYRMWLLKRL	CACCTATACAGATTGTGGCTCCTGAAGAGGCTT	CACCTATACAGAATGTGGCTCCTGAAGAGGCTT	1	chr4[(88049284, 88049312), (88053017, 88053020)]	ENSMUST00000107147.1[1, 2]	BC057079	38	38	53	19956.5	non-binders	226.522	weak binders
MB49	RACANLQVLI	RACANLQVLM	CGAGCGTGTGCGAACCTCCAGGTTCTGATT	CGAGCGTGTGCGAACCTCCAGGTTCTGATG	1	chr3[(83642480, 83642451)]	ENSMUST00000029623.9[0]	Tlr2	36	56	27	362.974	weak binders	8744.37	non-binders
MB49	SSILYVKSL	SAILYVKSL	AGCTCAATCCTGTACGTGAAATCCCTG	AGCGCAATCCTGTACGTGAAATCCCTG	1	chr2[(83641990, 83642016)]	ENSMUST00000111740.2[24]	Itgav	117	124	50	5697.07	non-binders	99.6628	moderate binders
MB49	KGHEFIPTF	KGHEFIPTL	AAAGGACATGAGTTTATTCCTACTTTT	AAAGGACATGAGTTTATTCCTACTCTT	1	chr12[(16984435, 16984461)]	ENSMUST00000168024.1[23]	Rock2	270	303	42	17143.4	non-binders	466.474	weak binders
MB49	VYSYFLSL	VYSYSLSL	GTTTATTCCTACTTTTTATCACTT	GTTTATTCCTACTCTTTATCACTT	1	chr12[(16984446, 16984469)]	ENSMUST00000168024.1[23]	Rock2	270	303	42	20473.4	non-binders	164.962	weak binders
MB49	VMLKKMVVLAV	VMLKKMVLLAV	GTGATGCTGAAGAAGATGGTGGTACTGGCAGTC	GTGATGCTGAAGAAGATGGTGTTACTGGCAGTC	1	chr11[(50110624, 50110592)]	ENSMUST00000020637.8[1]	Canx	2373	2644	64	5659.42	non-binders	431.399	weak binders
MB49	SQHLYRLWL	SQHLYRMWL	AGTCAGCACCTATACAGATTGTGGCTC	AGTCAGCACCTATACAGAATGTGGCTC	1	chr4[(88049278, 88049304)]	ENSMUST00000107147.1[1]	BC057079	38	38	53	3001.32	non-binders	424.25	weak binders
MB49	QHLYRLWLL	QHLYRMWLL	CAGCACCTATACAGATTGTGGCTCCTG	CAGCACCTATACAGAATGTGGCTCCTG	1	chr4[(88049281, 88049307)]	ENSMUST00000107147.1[1]	BC057079	38	38	53	19345	non-binders	190.522	weak binders
MB49	MLVDQYFPL	LLVDQYFPL	ATGCTGGTAGACCAGTACTTCCCTCTC	CTGCTGGTAGACCAGTACTTCCCTCTC	1	chr4[(86307880, 86307854)]	ENSMUST00000140382.1[0]	Plin2	302	408	39	7662.83	non-binders	257.303	weak binders
MB49	SYFLSLPNQL	SYSLSLPNQL	TCCTACTTTTTATCACTTCCCAACCAACTG	TCCTACTCTTTATCACTTCCCAACCAACTG	1	chr12[(16984452, 16984481)]	ENSMUST00000168024.1[23]	Rock2	270	303	42	8078.25	non-binders	218.96	weak binders
MB49	STFAIHLLKM	GTFAIHLLKM	AGCACCTTTGCCATCCATCTATTGAAGATG	GGCACCTTTGCCATCCATCTATTGAAGATG	1	chr13[(33121355, 33121384)]	ENSMUST00000006392.2[0]	Serpinb9b	41	53	35	6100.35	non-binders	88.6728	moderate binders
MB49	ATYIHPTML	ATYIYPTML	GCTACGTACATACACCCGACAATGCTT	GCTACGTACATATACCCGACAATGCTT	1	chr18[(70629126, 70629103), (70628171, 70628169)]	ENSMUST00000067556.3[6, 5]	4930503L19Rik	80	97	20	4827.58	non-binders	58.4159	moderate binders
MB49	VMLKKMVVL	VMLKKMVLL	GTGATGCTGAAGAAGATGGTGGTACTG	GTGATGCTGAAGAAGATGGTGTTACTG	1	chr11[(50110624, 50110598)]	ENSMUST00000020637.8[1]	Canx	2373	2644	64	3592.96	non-binders	196.227	weak binders
MB49	HLYRLWLL	HLYRMWLL	CACCTATACAGATTGTGGCTCCTG	CACCTATACAGAATGTGGCTCCTG	1	chr4[(88049284, 88049307)]	ENSMUST00000107147.1[1]	BC057079	38	38	53	12877.5	non-binders	133.835	moderate binders
UPPL1541	GNLAWTFTIL	GNLAWAFTIL	GGTAACCTAGCCTGGACCTTCACAATATTG	GGTAACCTAGCCTGGGCCTTCACAATATTG	1	chr7[(125629594, 125629565)]	ENSMUST00000098092.2[0]	Itpripl2	46	60	31	13674.5	non-binders	412.25	weak binders
UPPL1541	LAWTFTIL	LAWAFTIL	CTAGCCTGGACCTTCACAATATTG	CTAGCCTGGGCCTTCACAATATTG	1	chr7[(125629588, 125629565)]	ENSMUST00000098092.2[0]	Itpripl2	46	60	31	5714.45	non-binders	254.003	weak binders

## Sheet: Supplemental Table 5
Supplemental Table 5. Class II predicted neoantigens
Model	Variant peptide amino acid sequence	Reference peptide amino acid sequence	Variant peptide DNA coding sequence	Reference peptide DNA coding sequence	number of mutations	Genomic coordinates of coding DNA sequence	Exon(s) included	Gene identification	coverage_support	genomic_position_coverage	exome_coverage	H-2-IAbNm	H-2-IAbbinding property
BBN963	TATVIYVPPPFAAAA	TASVIYVPPPFAAAA	ACGGCTACTGTCATCTATGTCCCTCCTCCTTTTGCTGCTGCTGCC	ACGGCTTCTGTCATCTATGTCCCTCCTCCTTTTGCTGCTGCTGCC	1	chr6[(73213823, 73213867)]	ENSMUST00000171513.1[3]	Suclg1	114	200	70	384.45	weak binders
BBN963	LILAATAGHAGVVEI	LILAATAGHVGVVEI	CTGATCCTGGCGGCAACAGCAGGGCATGCTGGAGTTGTTGAAATC	CTGATCCTGGCGGCAACAGCAGGGCATGTTGGAGTTGTTGAAATC	1	chr18[(36792373, 36792417)]	ENSMUST00000136030.1[4]	Ankhd1	28	56	49	380.69	weak binders
BBN963	EEIFSIFAPTPTAMH	EETFSIFAPTPTAMH	GAAGAAATCTTCTCCATATTTGCACCAACACCTACTGCAATGCAT	GAAGAAACCTTCTCCATATTTGCACCAACACCTACTGCAATGCAT	1	chr11[(29056860, 29056904)]	ENSMUST00000020756.8[23]	Pnpt1	115	137	62	146.95	moderate binders
BBN963	PLILAATAGHAGVVE	PLILAATAGHVGVVE	CCACTGATCCTGGCGGCAACAGCAGGGCATGCTGGAGTTGTTGAA	CCACTGATCCTGGCGGCAACAGCAGGGCATGTTGGAGTTGTTGAA	1	chr18[(36792370, 36792414)]	ENSMUST00000136030.1[4]	Ankhd1	28	56	49	265.41	weak binders
BBN963	EIFSIFAPTPTAMHE	ETFSIFAPTPTAMHE	GAAATCTTCTCCATATTTGCACCAACACCTACTGCAATGCATGAA	GAAACCTTCTCCATATTTGCACCAACACCTACTGCAATGCATGAA	1	chr11[(29056863, 29056907)]	ENSMUST00000020756.8[23]	Pnpt1	115	137	62	129.11	moderate binders
BBN963	ALSTAAATGIPHALT	ALSTAAATGIPHALM	GCACTCAGCACGGCAGCTGCGACTGGCATTCCTCATGCACTCACG	GCACTCAGCACGGCAGCTGCGACTGGCATTCCTCATGCACTCATG	1	chr7[(150755932, 150755925), (150755841, 150755805)]	ENSMUST00000105909.3[10, 9]	Cars	111	149	31	435.87	weak binders
BBN963	FLCYTLSSPTCSEPA	SLCYTLSSPTCSEPA	TTCCTGTGTTACACTCTGTCAAGCCCTACATGCTCTGAGCCAGCA	TCCCTGTGTTACACTCTGTCAAGCCCTACATGCTCTGAGCCAGCA	1	chr11[(69788600, 69788556)]	ENSMUST00000108595.2[1]	Rai12	106	157	35	355.89	weak binders
BBN963	VSHFLCYTLSSPTCS	VSHSLCYTLSSPTCS	GTGTCACATTTCCTGTGTTACACTCTGTCAAGCCCTACATGCTCT	GTGTCACATTCCCTGTGTTACACTCTGTCAAGCCCTACATGCTCT	1	chr11[(69788609, 69788565)]	ENSMUST00000108595.2[1]	Rai12	106	157	35	484.22	weak binders
BBN963	DEEIFSIFAPTPTAM	DEETFSIFAPTPTAM	GATGAAGAAATCTTCTCCATATTTGCACCAACACCTACTGCAATG	GATGAAGAAACCTTCTCCATATTTGCACCAACACCTACTGCAATG	1	chr11[(29056857, 29056901)]	ENSMUST00000020756.8[23]	Pnpt1	115	137	62	283.85	weak binders
BBN963	TVIYVPPPFAAAAIN	SVIYVPPPFAAAAIN	ACTGTCATCTATGTCCCTCCTCCTTTTGCTGCTGCTGCCATTAAT	TCTGTCATCTATGTCCCTCCTCCTTTTGCTGCTGCTGCCATTAAT	1	chr6[(73213829, 73213873)]	ENSMUST00000171513.1[3]	Suclg1	114	200	70	288.66	weak binders
BBN963	ATVIYVPPPFAAAAI	ASVIYVPPPFAAAAI	GCTACTGTCATCTATGTCCCTCCTCCTTTTGCTGCTGCTGCCATT	GCTTCTGTCATCTATGTCCCTCCTCCTTTTGCTGCTGCTGCCATT	1	chr6[(73213826, 73213870)]	ENSMUST00000171513.1[3]	Suclg1	114	200	70	278.72	weak binders
BBN963	TPLILAATAGHAGVV	TPLILAATAGHVGVV	ACCCCACTGATCCTGGCGGCAACAGCAGGGCATGCTGGAGTTGTT	ACCCCACTGATCCTGGCGGCAACAGCAGGGCATGTTGGAGTTGTT	1	chr18[(36792367, 36792411)]	ENSMUST00000136030.1[4]	Ankhd1	28	56	49	209.18	weak binders
BBN963	HFLCYTLSSPTCSEP	HSLCYTLSSPTCSEP	CATTTCCTGTGTTACACTCTGTCAAGCCCTACATGCTCTGAGCCA	CATTCCCTGTGTTACACTCTGTCAAGCCCTACATGCTCTGAGCCA	1	chr11[(69788603, 69788559)]	ENSMUST00000108595.2[1]	Rai12	106	157	35	403.86	weak binders
BBN963	IIGGLSEASPATSEI	IIGGLSEARPATSEI	ATAATTGGAGGTTTGTCAGAGGCCAGTCCTGCCACATCAGAAATC	ATAATTGGAGGTTTGTCAGAGGCCAGACCTGCCACATCAGAAATC	1	chr16[(36408398, 36408354)]	ENSMUST00000169771.1[2]	Stfa2	96	136	101	457.09	weak binders
BBN963	FTPLILAATAGHAGV	FTPLILAATAGHVGV	TTTACCCCACTGATCCTGGCGGCAACAGCAGGGCATGCTGGAGTT	TTTACCCCACTGATCCTGGCGGCAACAGCAGGGCATGTTGGAGTT	1	chr18[(36792364, 36792408)]	ENSMUST00000136030.1[4]	Ankhd1	28	56	49	292.88	weak binders
BBN963	SHFLCYTLSSPTCSE	SHSLCYTLSSPTCSE	TCACATTTCCTGTGTTACACTCTGTCAAGCCCTACATGCTCTGAG	TCACATTCCCTGTGTTACACTCTGTCAAGCCCTACATGCTCTGAG	1	chr11[(69788606, 69788562)]	ENSMUST00000108595.2[1]	Rai12	106	157	35	413.58	weak binders
BBN963	IFSIFAPTPTAMHEA	TFSIFAPTPTAMHEA	ATCTTCTCCATATTTGCACCAACACCTACTGCAATGCATGAAGCA	ACCTTCTCCATATTTGCACCAACACCTACTGCAATGCATGAAGCA	1	chr11[(29056866, 29056910)]	ENSMUST00000020756.8[23]	Pnpt1	115	137	62	113.43	moderate binders
BBN963	GFTPLILAATAGHAG	GFTPLILAATAGHVG	GGTTTTACCCCACTGATCCTGGCGGCAACAGCAGGGCATGCTGGA	GGTTTTACCCCACTGATCCTGGCGGCAACAGCAGGGCATGTTGGA	1	chr18[(36792115, 36792115), (36792362, 36792405)]	ENSMUST00000136030.1[3, 4]	Ankhd1	28	56	49	415.12	weak binders
MB49	NIAYQSAPIQIVAPE	NIAYQSAPIQNVAPE	AACATTGCTTACCAGTCAGCACCTATACAGATTGTGGCTCCTGAA	AACATTGCTTACCAGTCAGCACCTATACAGAATGTGGCTCCTGAA	1	chr4[(88049265, 88049309)]	ENSMUST00000107147.1[1]	BC057079	38	38	53	105.3	moderate binders
MB49	RNIAYQSAPIQIVAP	RNIAYQSAPIQNVAP	AGAAACATTGCTTACCAGTCAGCACCTATACAGATTGTGGCTCCT	AGAAACATTGCTTACCAGTCAGCACCTATACAGAATGTGGCTCCT	1	chr4[(88049262, 88049306)]	ENSMUST00000107147.1[1]	BC057079	38	38	53	95.13	moderate binders
MB49	AYQSAPIQIVAPEEA	AYQSAPIQNVAPEEA	GCTTACCAGTCAGCACCTATACAGATTGTGGCTCCTGAAGAGGCT	GCTTACCAGTCAGCACCTATACAGAATGTGGCTCCTGAAGAGGCT	1	chr4[(88049271, 88049312), (88053017, 88053019)]	ENSMUST00000107147.1[1, 2]	BC057079	38	38	53	332.13	weak binders
MB49	LKVFNFNSSNTSHLG	LKVFNFNSSNTSRLG	TTAAAGGTCTTCAATTTCAATTCATCAAATACATCTCATCTGGGT	TTAAAGGTCTTCAATTTCAATTCATCAAATACATCTCGTCTGGGT	1	chr10[(43717154, 43717110)]	ENSMUST00000099866.2[18]	Aim1	122	135	47	491.09	weak binders
MB49	IAYQSAPIQIVAPEE	IAYQSAPIQNVAPEE	ATTGCTTACCAGTCAGCACCTATACAGATTGTGGCTCCTGAAGAG	ATTGCTTACCAGTCAGCACCTATACAGAATGTGGCTCCTGAAGAG	1	chr4[(88049268, 88049312)]	ENSMUST00000107147.1[1]	BC057079	38	38	53	166.38	weak binders
MB49	VRNIAYQSAPIQIVA	VRNIAYQSAPIQNVA	GTGAGAAACATTGCTTACCAGTCAGCACCTATACAGATTGTGGCT	GTGAGAAACATTGCTTACCAGTCAGCACCTATACAGAATGTGGCT	1	chr4[(88049259, 88049303)]	ENSMUST00000107147.1[1]	BC057079	38	38	53	96.98	moderate binders
MB49	YVRNIAYQSAPIQIV	YVRNIAYQSAPIQNV	TATGTGAGAAACATTGCTTACCAGTCAGCACCTATACAGATTGTG	TATGTGAGAAACATTGCTTACCAGTCAGCACCTATACAGAATGTG	1	chr4[(88049256, 88049300)]	ENSMUST00000107147.1[1]	BC057079	38	38	53	133.59	moderate binders
MB49	SLKVFNFNSSNTSHL	SLKVFNFNSSNTSRL	TCCTTAAAGGTCTTCAATTTCAATTCATCAAATACATCTCATCTG	TCCTTAAAGGTCTTCAATTTCAATTCATCAAATACATCTCGTCTG	1	chr10[(43717157, 43717113)]	ENSMUST00000099866.2[18]	Aim1	122	135	47	493.54	weak binders
UPPL1541	SFLLGFSAGSAIHWR	SFLLGFSAGSAIDWR	TCGTTCTTACTGGGCTTCAGCGCGGGATCTGCCATCCACTGGCGG	TCGTTCTTACTGGGCTTCAGCGCGGGATCTGCCATCGACTGGCGG	1	chr11[(88816632, 88816608), (88813868, 88813849)]	ENSMUST00000100630.4[11, 10]	Scpep1	62	74	46	204.27	weak binders
UPPL1541	LLGFSAGSAIHWREP	LLGFSAGSAIDWREP	TTACTGGGCTTCAGCGCGGGATCTGCCATCCACTGGCGGGAACCC	TTACTGGGCTTCAGCGCGGGATCTGCCATCGACTGGCGGGAACCC	1	chr11[(88816626, 88816608), (88813868, 88813843)]	ENSMUST00000100630.4[11, 10]	Scpep1	62	74	46	354.64	weak binders
UPPL1541	LSFLLGFSAGSAIHW	LSFLLGFSAGSAIDW	CTATCGTTCTTACTGGGCTTCAGCGCGGGATCTGCCATCCACTGG	CTATCGTTCTTACTGGGCTTCAGCGCGGGATCTGCCATCGACTGG	1	chr11[(88816635, 88816608), (88813868, 88813852)]	ENSMUST00000100630.4[11, 10]	Scpep1	62	74	46	252.45	weak binders
UPPL1541	FLLGFSAGSAIHWRE	FLLGFSAGSAIDWRE	TTCTTACTGGGCTTCAGCGCGGGATCTGCCATCCACTGGCGGGAA	TTCTTACTGGGCTTCAGCGCGGGATCTGCCATCGACTGGCGGGAA	1	chr11[(88816629, 88816608), (88813868, 88813846)]	ENSMUST00000100630.4[11, 10]	Scpep1	62	74	46	231.58	weak binders
UPPL1541	LLSFLLGFSAGSAIH	LLSFLLGFSAGSAID	CTCCTATCGTTCTTACTGGGCTTCAGCGCGGGATCTGCCATCCAC	CTCCTATCGTTCTTACTGGGCTTCAGCGCGGGATCTGCCATCGAC	1	chr11[(88816638, 88816608), (88813868, 88813855)]	ENSMUST00000100630.4[11, 10]	Scpep1	62	74	46	366.99	weak binders
